# Supplementary material for: Measuring nanoparticle-induced resonance energy transfer effect by electrogenerated chemiluminescent reactions
Source: Royal Society of Chemistry journal article supplement (doi:10.1039/c9ra08857a), 2020-01-01

## Supporting Information

### Measuring Nanoparticle-Induced Resonance Energy Transfer Effect by Electrogenerated Chemiluminescent Reactions

Pilar Perez-Tejeda<sup>a\*</sup>, Alberto Martínez-Delgado<sup>a</sup>, Elia Grueso<sup>a</sup>, Rosa M. Giráldez-Pérez<sup>a,b</sup>

<sup>a</sup>Department of Physical Chemistry, Faculty of Chemistry, University of Sevilla.  
C/ Profesor García González, 1, 41012. Sevilla, Spain

<sup>b</sup>Department of Cellular Biology, Physiology and Immunology, University of Córdoba. Spain

\* Address all correspondence to E-mail: [pptejeda@us.es](mailto:pptejeda@us.es). ORCID: [0000-0001-9703-7886](https://orcid.org/0000-0001-9703-7886)

**Figure S1.** ECL spectra for  $[\text{Ru}(\text{bpy})_3]^{2+} + \text{C}_2\text{O}_4^{2-}$  reaction in the presence of AuNPs. Scan rate:  $10.0 \text{ mV s}^{-1}$ .  $7.5 \times 10^{-8} \text{ M}$  [AuNPs], cacodylate buffer ( $3.0 \times 10^{-2} \text{ M}$   $[\text{NaCH}_3\text{AsO}_2]$  /  $3.8 \times 10^{-3} \text{ M}$   $[\text{HCl}]$  plus  $6.2 \times 10^{-3} \text{ M}$   $[\text{NaCl}]$ ) pH 7.0. Ionic strength 0.040 M.

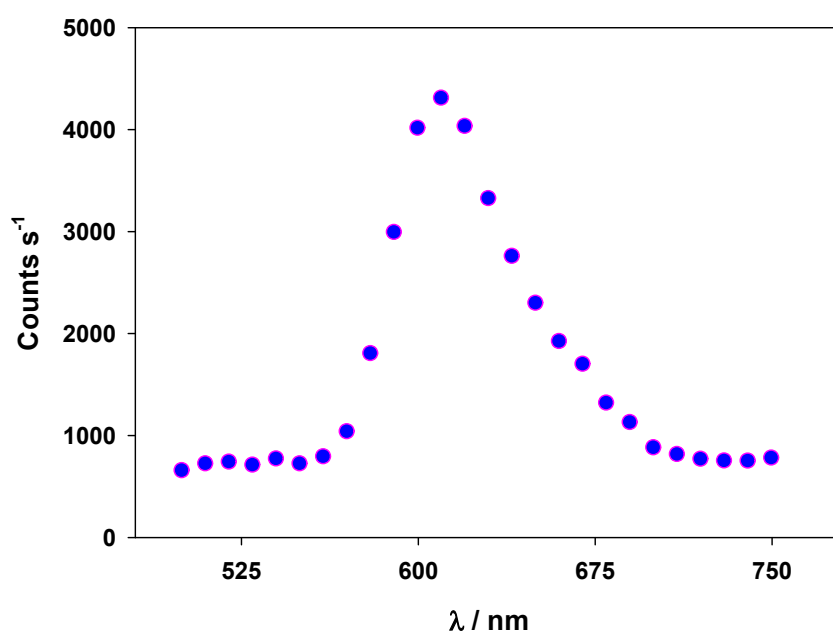

The ECL spectrum is identical to the photoluminescent spectrum, suggesting that the ECL reaction could follow the same mechanism in the absence as well as in the presence of NPs.

**Figure S2.** CV voltammogram for the  $[\text{Ru}(\text{bpy})_3]^{3+/2+}$  couple in  $5.0 \times 10^{-8}$  M AuNPs. cacodylate buffer, pH 7.0 ( $[\text{NaCH}_3\text{AsO}_2] = 3.0 \times 10^{-2}$  M,  $[\text{HCl}] = 3.8 \times 10^{-3}$  M),  $6.2 \times 10^{-3}$  M NaCl. Ionic strength 0.040 M.

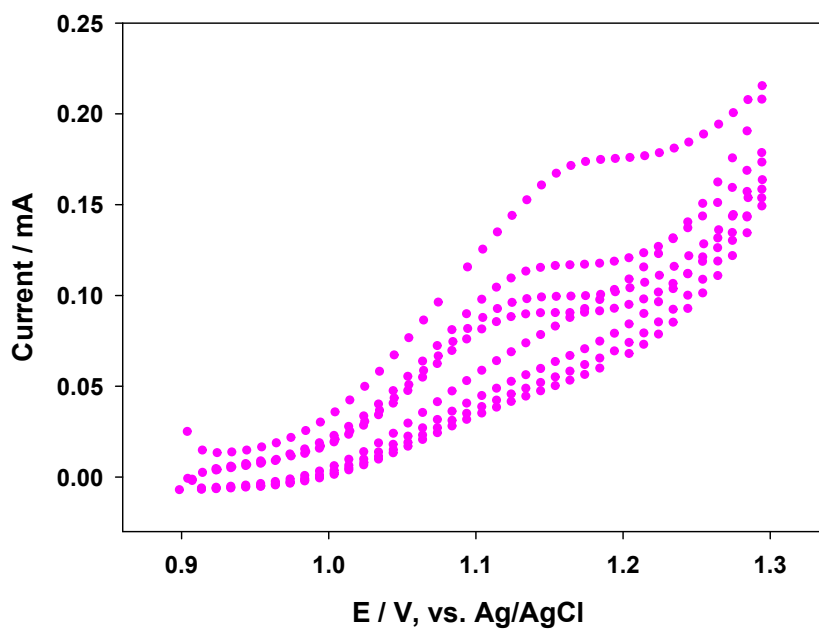

**Figure S3.** AFM photogram for Au@tiopronin at  $1.0 \times 10^{-8}$  M (top) and  $8.0 \times 10^{-8}$  M (bottom) in the absence of the  $[\text{Ru}(\text{bpy})_3]^{2+}$  complex and their corresponding histograms, cacodylate buffer pH 7.0.

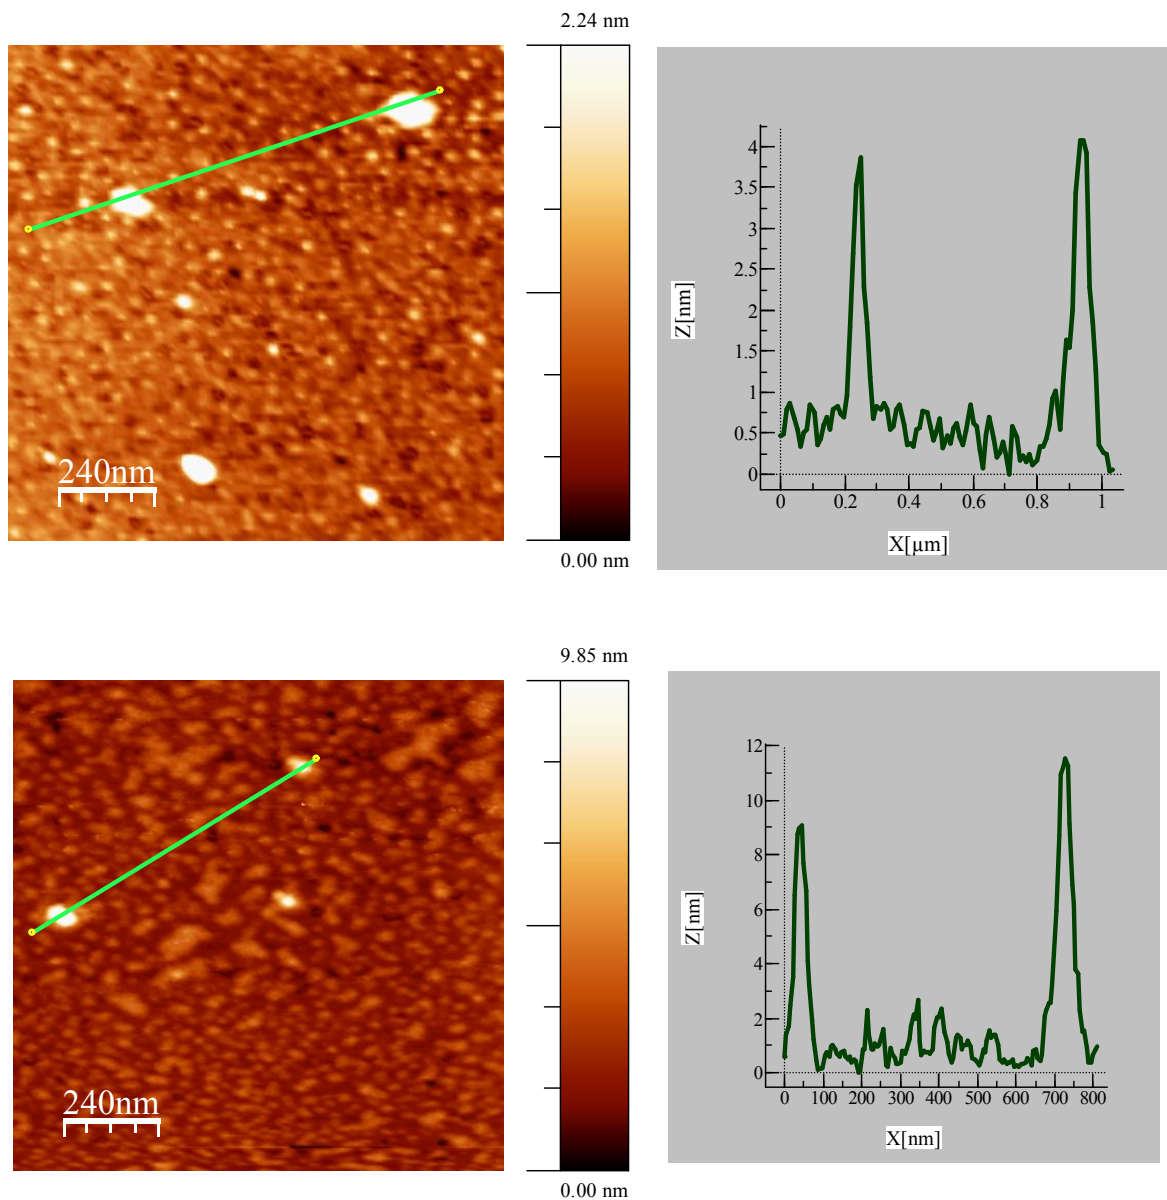

**Figure S4 (A and B).** Photoluminescent spectra of the  $[\text{Ru}(\text{bpy})_3]^{2+}$  species as a function of the  $[\text{Au@tiopronin}]$ , cacodylate buffer pH 7.0.

A) Excitation wavelength 453 nm.  $2.0 \times 10^{-6}$  M  $[\text{Ru}(\text{bpy})_3]^{2+}$ . Red without NPs, green  $4.0 \times 10^{-7}$  M, yellow  $1.0 \times 10^{-6}$  M and blue  $2.0 \times 10^{-6}$  M AuNPs.

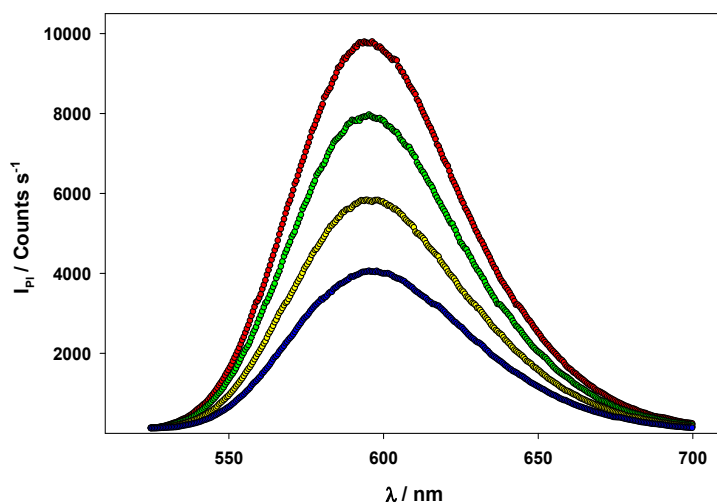

B) Excitation wavelength 500 nm.  $2.0 \times 10^{-4}$  M  $[\text{Ru}(\text{bpy})_3]^{2+}$ . Black without NPs, pink  $2.0 \times 10^{-7}$  M, dark green  $1.0 \times 10^{-6}$  M, cyan  $2.0 \times 10^{-6}$  M, blue  $3.0 \times 10^{-6}$  M, yellow  $3.5 \times 10^{-6}$  M and red  $4.0 \times 10^{-6}$  M AuNPs.

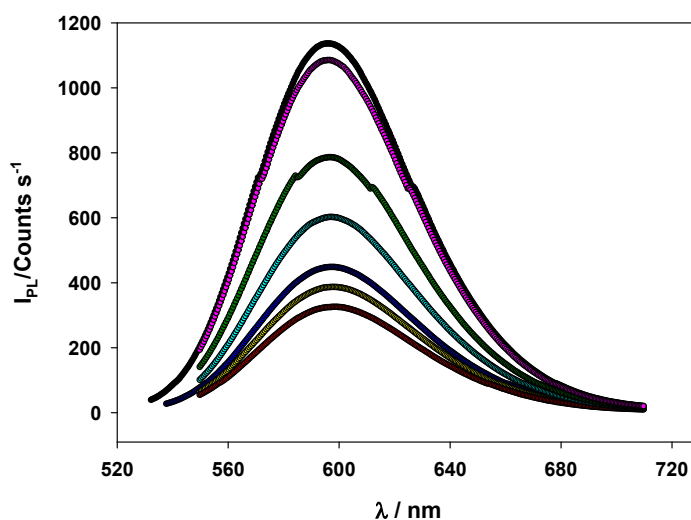

**Figure S5.** Stern-Volmer approach plots, with experimental data for the photoluminescent spectra in Figure S4(B), entire range.

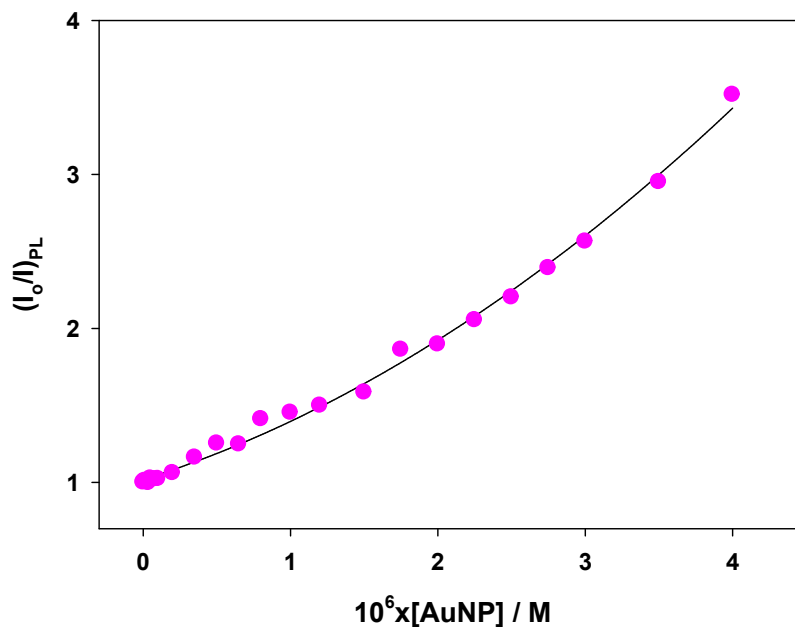

Quadratic equation, taking into account static ( $K_S$ ) and dynamic ( $K_D$ ) quenching:

$$\left(\frac{I_0}{I}\right)_{PL} = 1 + (K_D + K_S)[AuNPs] + (K_D K_S)[AuNPs]^2 \quad (15)$$

Although the fit between experimental data and this equation was good, the results for  $K_S$  and  $K_D$  are not consistent.

**Figure S6.** Photoluminescent spectra of the  $[\text{Ru}(\text{bpy})_3]^{2+*}$  and  $\text{AuNP}^*$  excited species. Red,  $[\text{Ru}(\text{bpy})_3]^{2+*}$  spectrum in the presence of the  $8.0 \times 10^{-8}$  M  $[\text{AuNPs}]$ . Blue,  $[\text{Ru}(\text{bpy})_3]^{2+*}$  spectrum in the absence of the AuNPs. Black,  $\text{AuNP}^*$  spectrum. Green, sum of the  $[\text{Ru}(\text{bpy})_3]^{2+*}$  and  $\text{AuNP}^*$  spectra.  $4.0 \times 10^{-7}$  M  $[\text{Ru}(\text{bpy})_3]^{2+}$ ,  $8.0 \times 10^{-8}$  M  $[\text{AuNPs}]$ , cacodylate buffer pH 7.0.

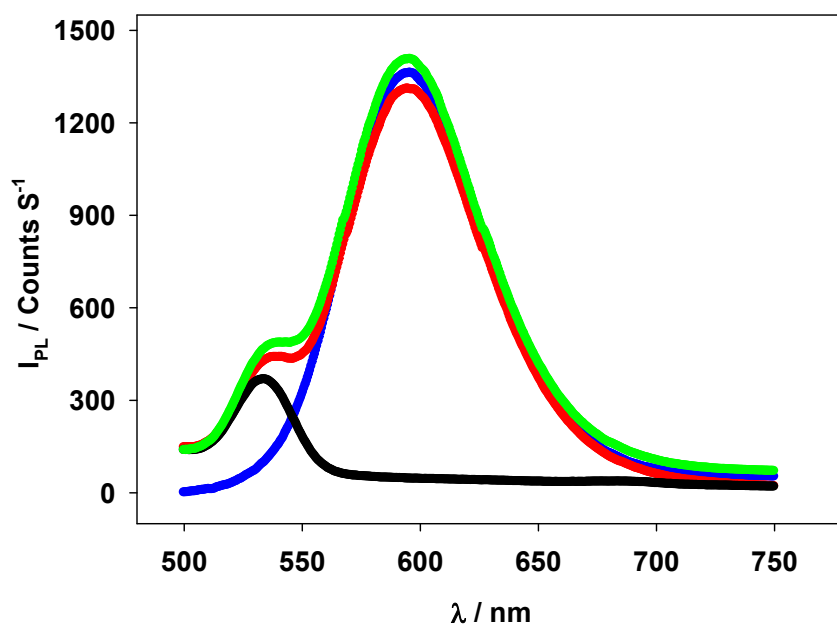

Supplement: c9ra08857a1.pdf [file c9ra08857a1.pdf]
